# Supplementary material
Source: PubMed Central journal article supplement (PMC3180641)

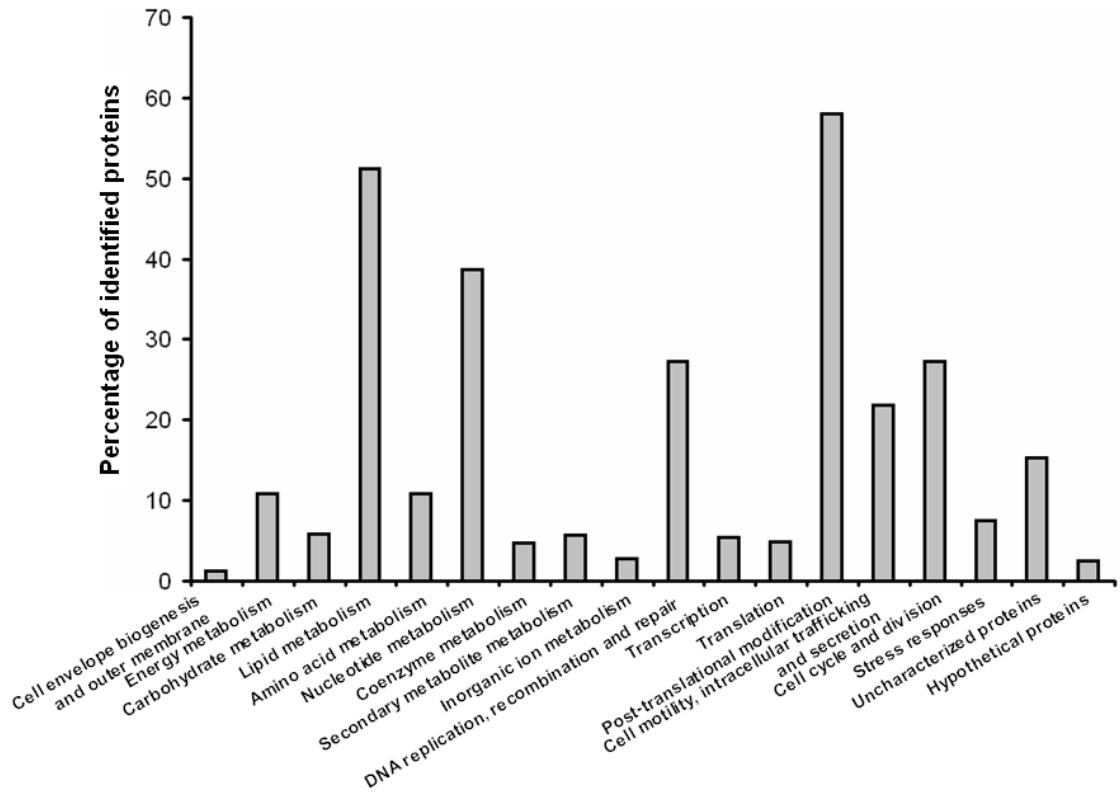

Supplement: 530926.f1.pdf [file 530926.f1.pdf]
